# Supplementary material
Source: publisher site journal article supplement (https://www.spandidos-publications.com/5914/downloadSupplementary)

Figure S1. Relationship between CTSS expression and infiltrating activated memory CD4<sup>+</sup> T cells and CD8<sup>+</sup> T cells in BLCA, SKCM and UVM. BLCA, bladder urothelial carcinoma; SKCM, skin cutaneous melanoma; LGG, lower grade glioma; UVM, uveal melanoma; CTSS, cathepsin S; KIRC, kidney renal clear cell carcinoma.

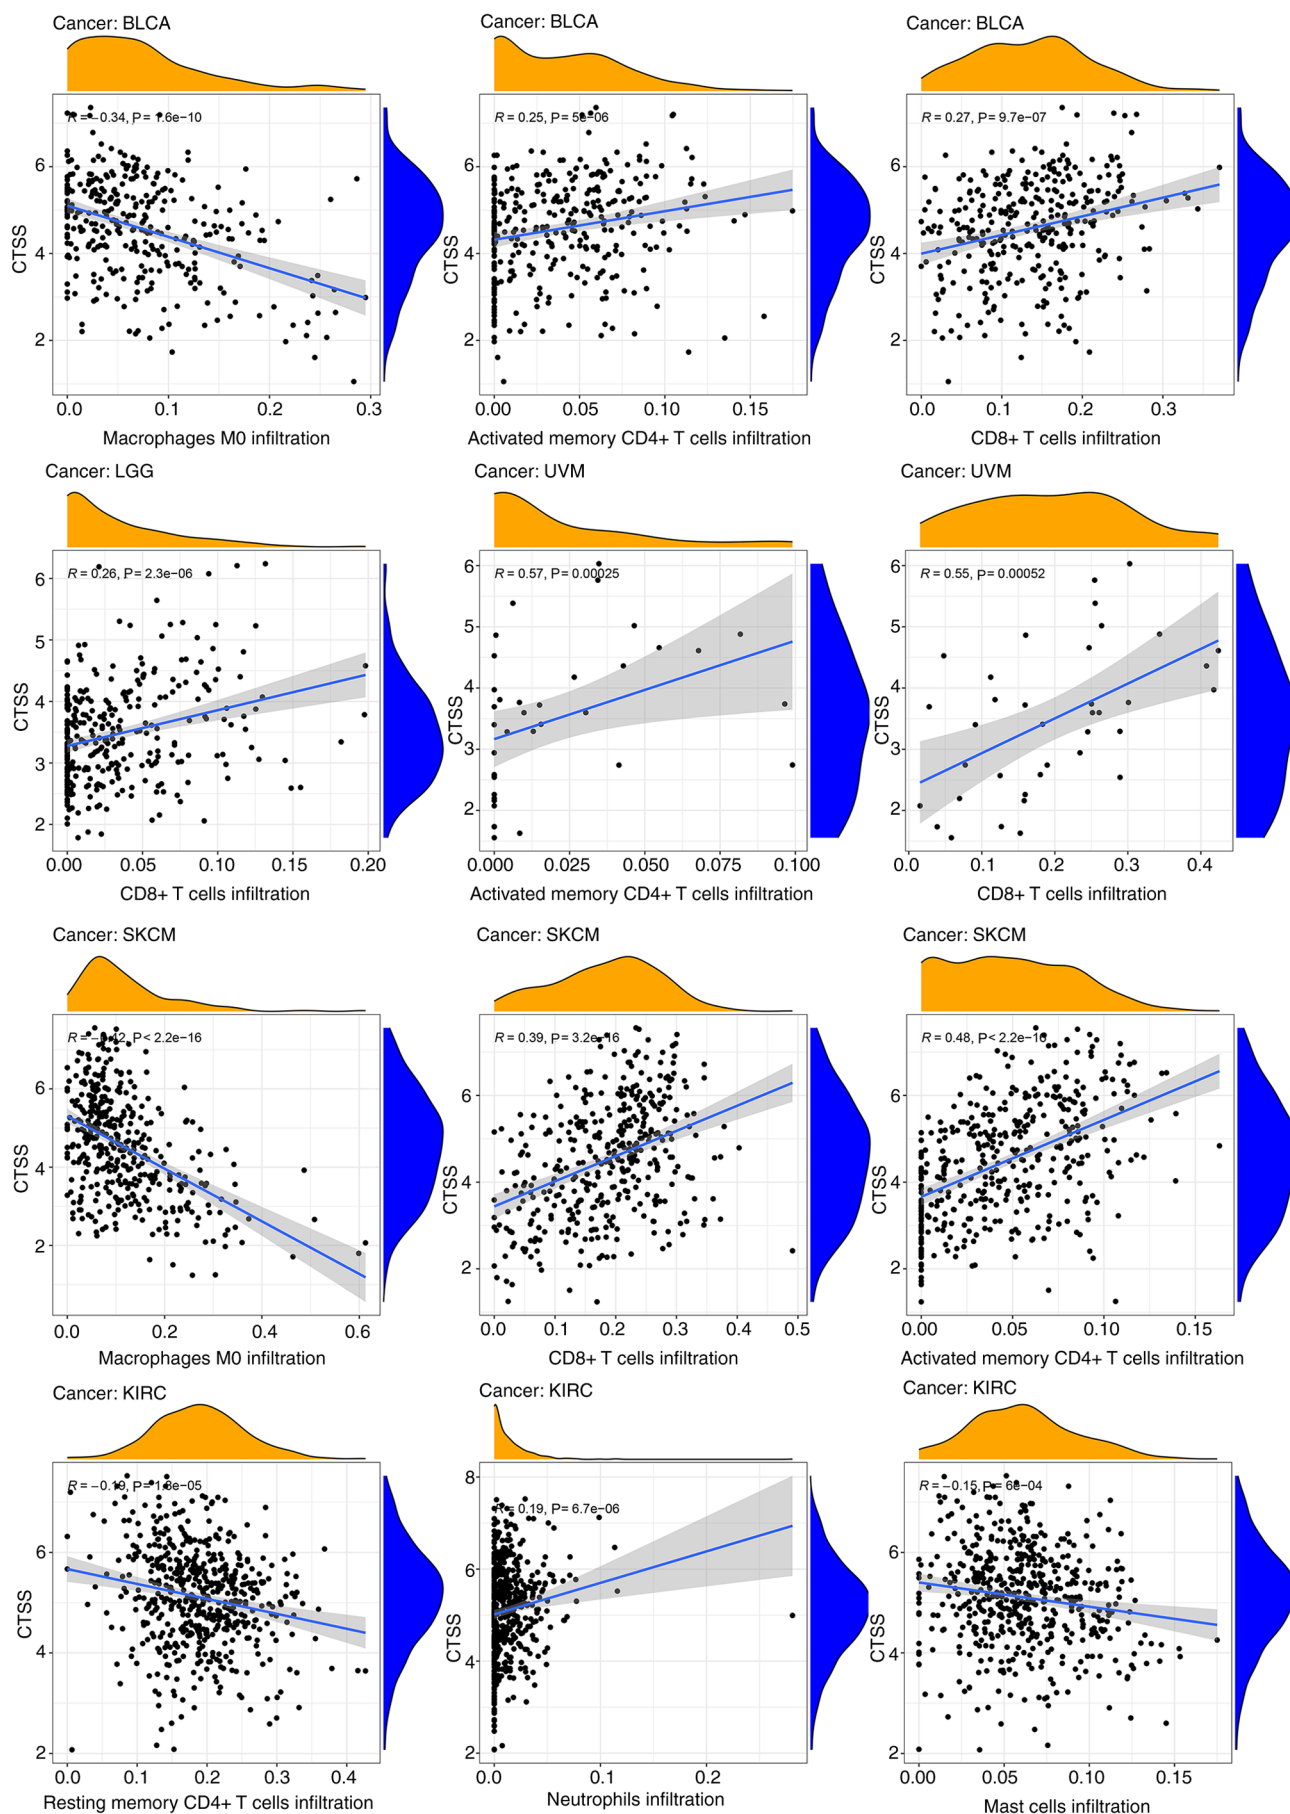

Figure S2. Original full-membrane images of the western blotting. CTSS, cathepsin S; KIRC, kidney renal clear cell carcinoma.

KIRC1

Western blot original full film image of Figure 11a

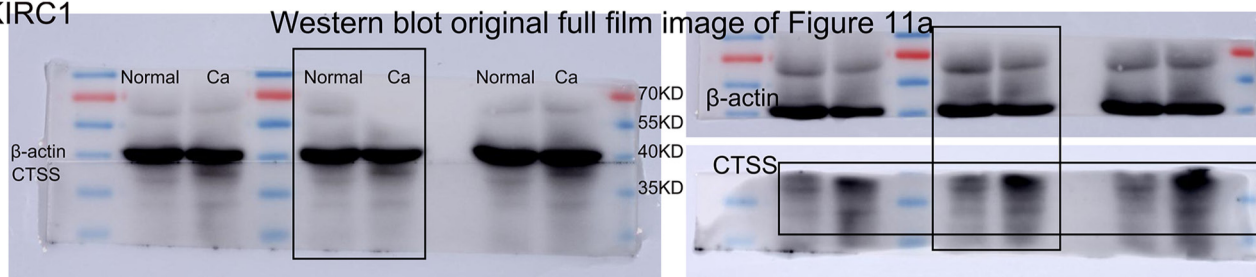

Western blot original full film image in repeated experiments with multiple samples (KIRC2,3,4)

KIRC2

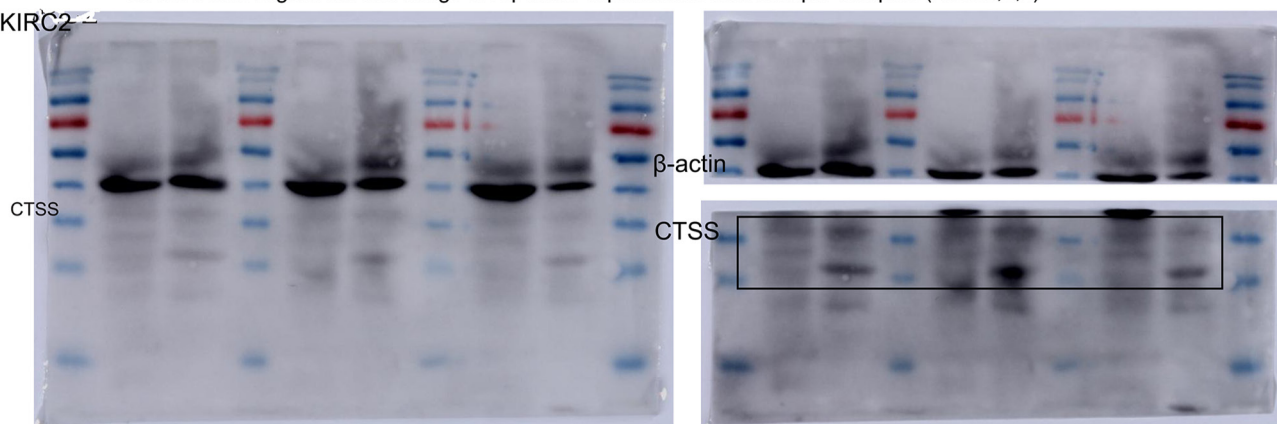

KIRC3

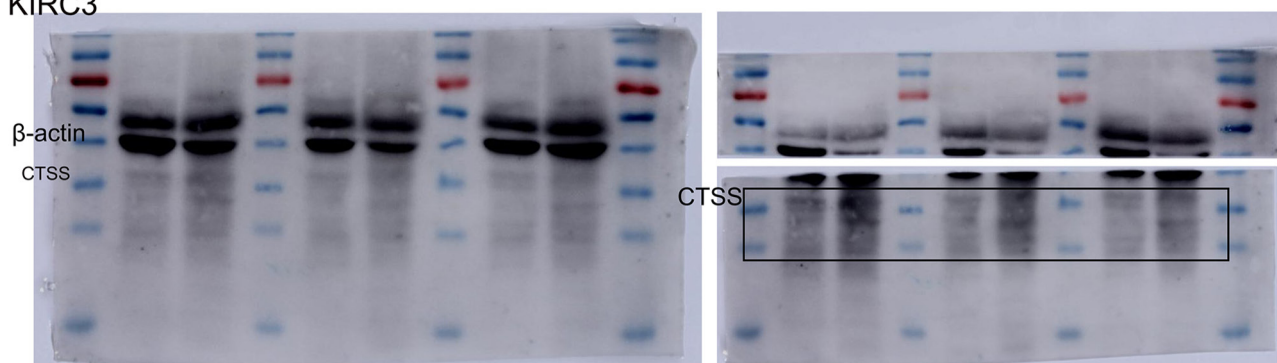

KIRC4

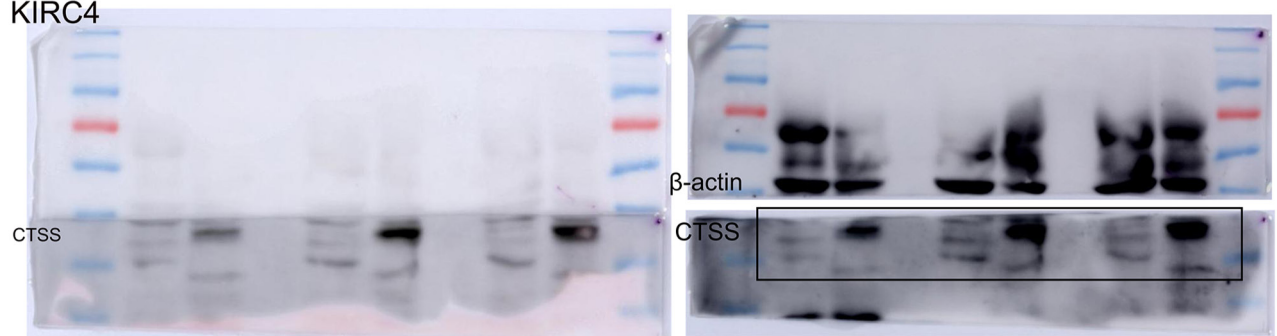

Supplement: Supplementary file 1 [file downloadSupplementary]
